# Supplementary material for: Contemporary Antiretroviral Therapy Dysregulates Iron Transport and Augments Mitochondrial Dysfunction in HIV-Infected Human Microglia and Neural-Lineage Cells
Source: MDPI journal article supplement (doi:10.3390/ijms241512242), 2023-07-31
Supplement: s1 [file s1]

## Supplemental Materials

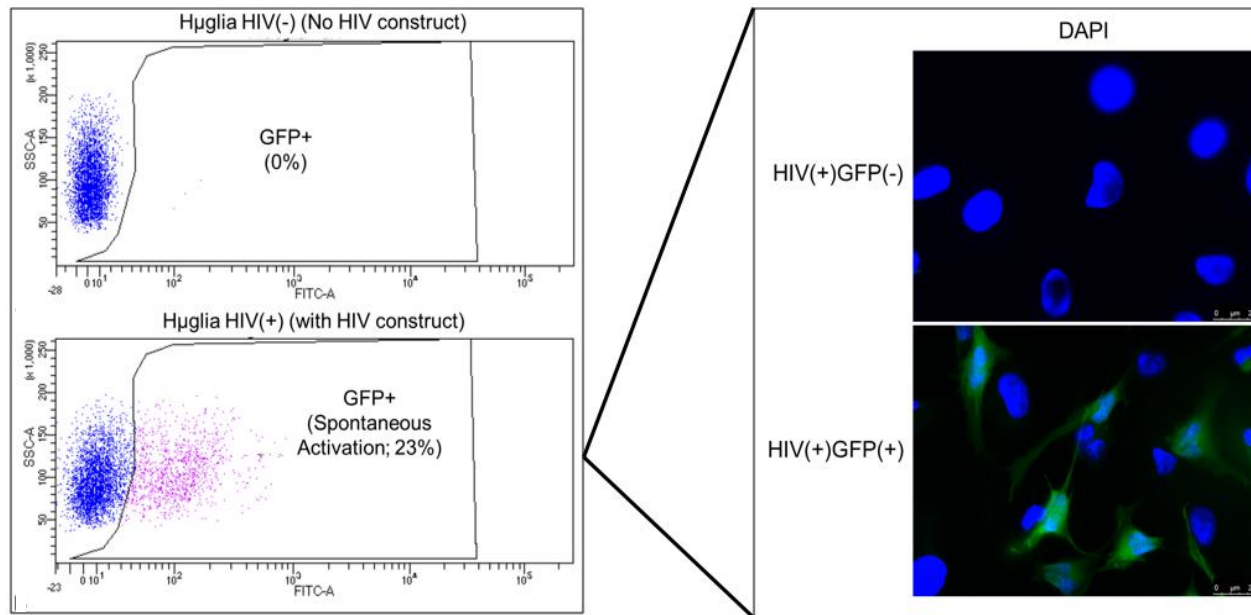

**Figure S1.** FACS analysis of HIV+ hμglia cell populations. Scatter plot (**top left panel**) shows no GFP expression in uninfected hμglia; the **bottom left panel** shows HIV+ (infected) C20 hμglia sorted into GFP-negative (blue dots) and GFP+ (pink dots). X-axis shows mean fluorescence intensity of fluorescein isothiocyanate (FITC)-A signal within HIV+ hμglia; Y-axis shows signal gated according to side-scatter-area (SS-A). GFP+ and GFP-negative cell populations were sorted and separated for use in later experiments. Green fluorescence in these populations is shown in the **top right panel** (HIV+ hμglia containing latent HIV provirus have blue nuclei stained with DAPI and are GFP-negative) and **bottom right** (activated HIV+/GFP+ hμglia with ongoing HIV transcription show green fluorescence).

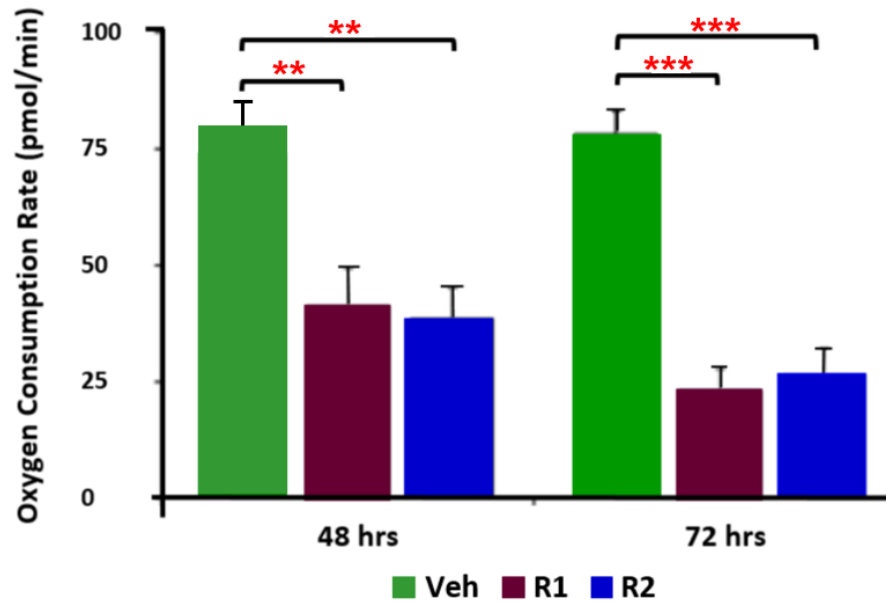

**Figure S2.** Effects of antiretroviral Regimen1 (*R1*) and 2 (*R2*) on the basal oxygen consumption rate (OCR) in SH-SY5Y cells at 48 and 72 hours. Both *R1* and *R2* significantly reduce the basal OCR at 72 hours compared to vehicle-treated (*Veh*) controls. Results summarizing at least 3 separate experiments are shown. \*\* $p < 0.01$ ; \*\*\* $p < 0.001$  (Mann-Whitney U test)

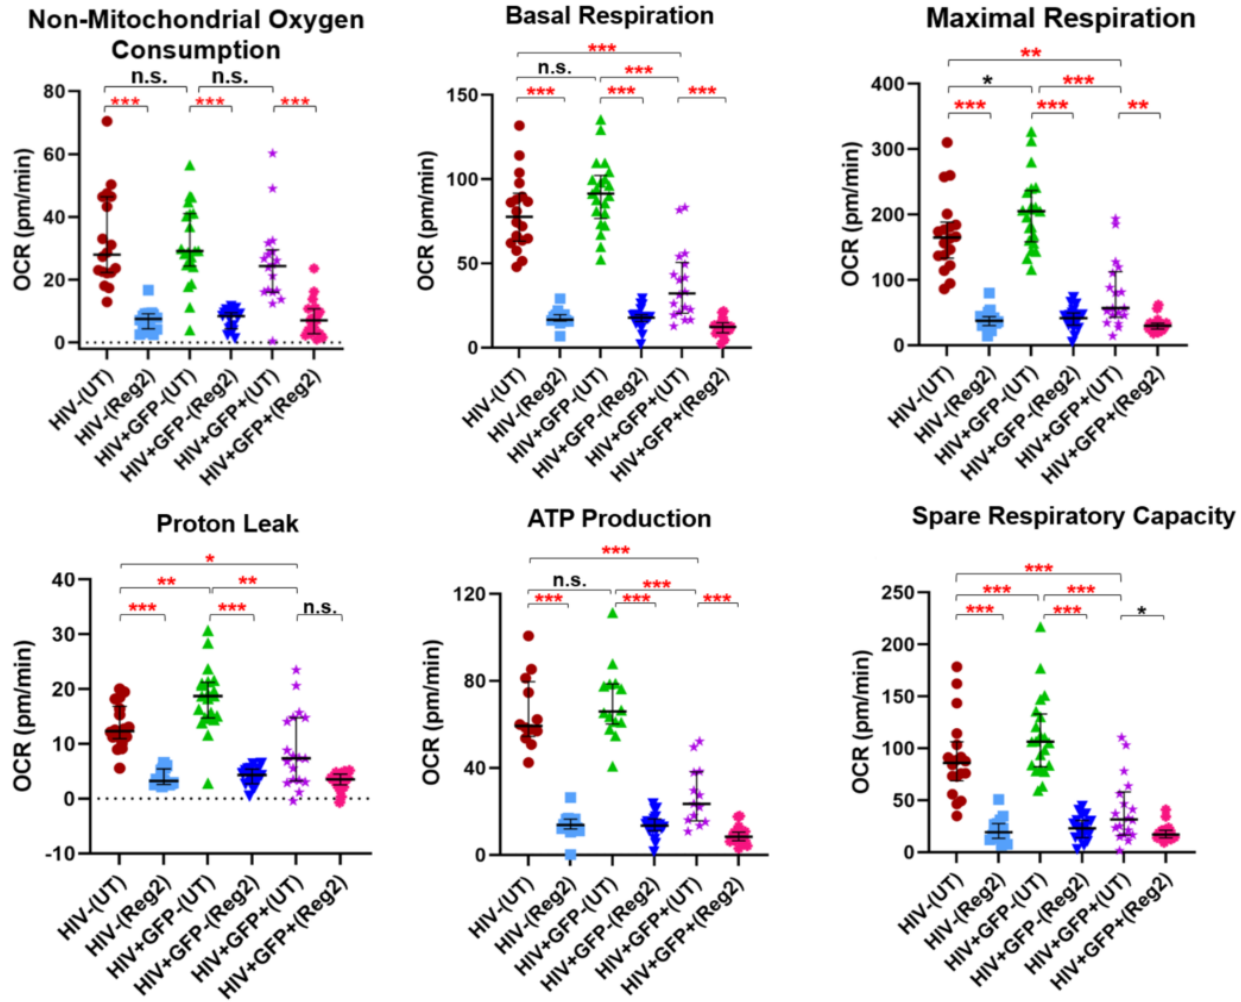

**Figure S3.** Differences in mitochondrial energy expenditure across uninfected, latently infected HIV+, and activated HIV+ hupglia groups before and after 24 hours of treatment with antiretroviral drugs. All components of mitochondrial respiration are shown. *Abbreviations:* OCR, oxygen consumption rate (pmol/min); UT, untreated (vehicle); Reg2, Regimen2. Statistical significance: n.s.,  $p > 0.10$ ; \* $p$ -value=0.05-0.09; \* $p < 0.05$ ; \*\* $p < 0.001$ ; \*\*\* $p < 0.0001$ .

| Basal OCR     |    |                   |
|---------------|----|-------------------|
|               | N  | Median (IQR)      |
| HIV- UT       | 12 | 71.6 (66.7, 91.8) |
| HIV- Reg2     | 16 | 16.6 (15.9, 19.4) |
| HIV-GFP- UT   | 14 | 84.3 (77.5, 96.2) |
| HIV-GFP- Reg2 | 19 | 17.9 (15.6, 19.5) |
| HIV+GFP+ UT   | 13 | 31.2 (19.4, 43.3) |
| HIV+GFP+ Reg2 | 19 | 12.3 (8.8, 14.8)  |

| Proton Leak   |    |                 |
|---------------|----|-----------------|
|               | N  | Median (IQR)    |
| HIV- UT       | 12 | 11.9 (11.3, 14) |
| HIV- Reg2     | 16 | 3.2 (2.7, 5.3)  |
| HIV-GFP- UT   | 14 | 16.6 (15.4, 19) |
| HIV-GFP- Reg2 | 19 | 4.3 (2.7, 5.4)  |
| HIV+GFP+ UT   | 13 | 4.2 (2.9, 9.9)  |
| HIV+GFP+ Reg2 | 19 | 3.5 (2.5, 4.5)  |

| Spare Respiratory Capacity |    |                     |
|----------------------------|----|---------------------|
|                            | N  | Median (IQR)        |
| HIV- UT                    | 12 | 79.2 (67.0, 94.6)   |
| HIV- Reg2                  | 16 | 19.3 (13.6, 27.2)   |
| HIV-GFP- UT                | 14 | 100.8 (81.7, 120.6) |
| HIV-GFP- Reg2              | 19 | 23.0 (14.1, 30.5)   |
| HIV+GFP+ UT                | 13 | 25.0 (16.6, 36.9)   |
| HIV+GFP+ Reg2              | 19 | 17.0 (13.9, 21.1)   |

| Maximal OCR   |    |                      |
|---------------|----|----------------------|
|               | N  | Median (IQR)         |
| HIV- UT       | 12 | 153.8 (133.8, 175.3) |
| HIV- Reg2     | 16 | 37.4 (30.3, 43.4)    |
| HIV-GFP- UT   | 14 | 184.6 (159.5, 215.9) |
| HIV-GFP- Reg2 | 19 | 41.6 (30.8, 49.4)    |
| HIV+GFP+ UT   | 13 | 52.5 (32.9, 80.2)    |
| HIV+GFP+ Reg2 | 19 | 29.8 (24.7, 33.9)    |

| ATP Production |    |                   |
|----------------|----|-------------------|
|                | N  | Median (IQR)      |
| HIV- UT        | 12 | 59.2 (55.3, 77.9) |
| HIV- Reg2      | 16 | 13.8 (12, 16.3)   |
| HIV-GFP- UT    | 14 | 66 (60.9, 78.6)   |
| HIV-GFP- Reg2  | 19 | 13.5 (11.1, 16.5) |
| HIV+GFP+ UT    | 13 | 23.5 (16, 37.8)   |
| HIV+GFP+ Reg2  | 19 | 8.3 (6.6, 10.5)   |

| Non-Mitochondrial OCR |    |                   |
|-----------------------|----|-------------------|
|                       | N  | Median (IQR)      |
| HIV- UT               | 12 | 30.8 (22.5, 47.0) |
| HIV- Reg2             | 16 | 7.5 (4.6, 9.1)    |
| HIV-GFP- UT           | 14 | 36.0 (25.2, 38.4) |
| HIV-GFP- Reg2         | 19 | 8.4 (4.4, 9.5)    |
| HIV+GFP+ UT           | 13 | 26.7 (20.8, 32.4) |
| HIV+GFP+ Reg2         | 19 | 7.1 (2.8, 10.8)   |

**Table S1.** Comparison of mitochondrial respiratory measurements in uninfected, latently infected-HIV+, activated HIV+ hupglia with and without antiretroviral Regimen2 (Reg2) exposure for 24 hours. Medians and interquartile ranges (IQR) of oxygen consumption rate (OCR) values in pmol/min (normalized to total cellular protein) are shown. *p*-values for comparisons between vehicle-treated (UT) controls and treated cells of each type are provided in Figures 2-4 of the main text and in Figure S3. *HIV*-, uninfected; *GFP*-, latently infected-HIV+; *GFP*+, activated HIV+ cells.

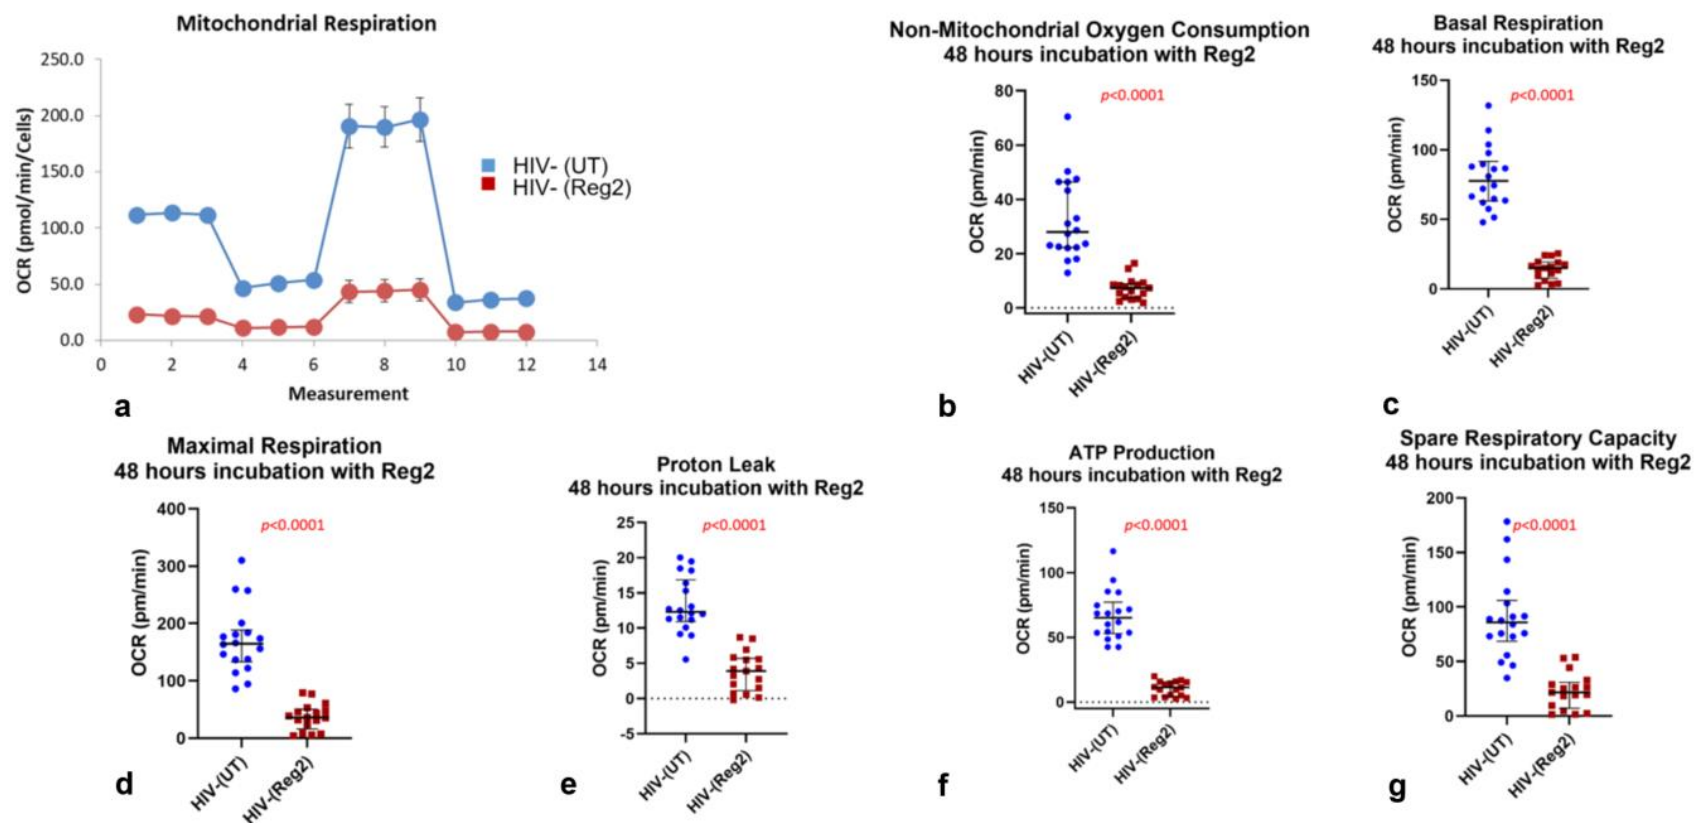

**Figure S4.** Mitochondrial bioenergetics measurements at 48 hours following Regimen2 exposure in uninfected hpglia. (a) MitoStress curve (blue=vehicle-treated controls (UT); red=drug-treated cells); (b) non-mitochondrial OCR; (c) basal respiration; (d) maximal respiration; (e) proton leak; (f) ATP production; (g) spare respiratory capacity. Median and interquartile ranges of OCR values obtained from at least six technical replicates and three separate experiments are shown. ( $p$ -values obtained by Mann-Whitney U test)

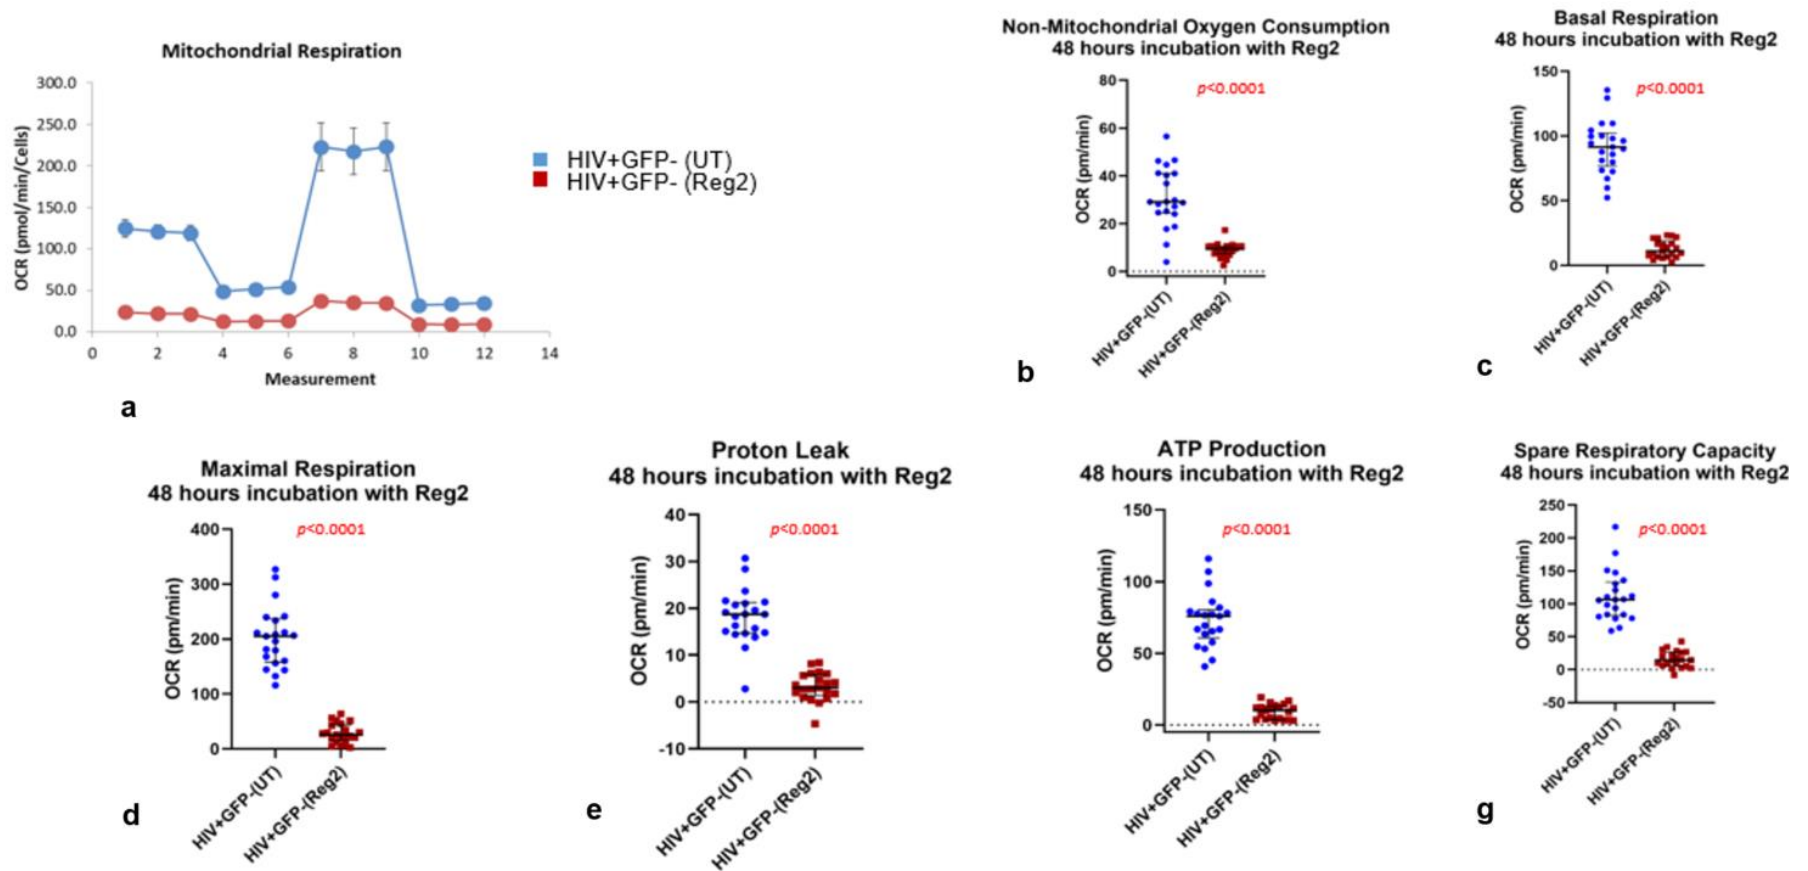

**Figure S5.** Antiretroviral Regimen2 (Reg2) reduces multiple components of mitochondrial respiratory function in latently infected-HIV+ huplia at 48 hours. **(a)** MitoStress curve (blue=vehicle-treated controls (UT); red=drug-treated cells); **(b)** non-mitochondrial OCR; **(c)** basal respiration; **(d)** maximal respiration; **(e)** proton leak; **(f)** ATP production; **(g)** Spare respiratory capacity. Median and interquartile ranges of OCR values obtained from at least three separate experiments, each with six technical replicates, are shown. ( $p$ -values obtained by Mann-Whitney U test)

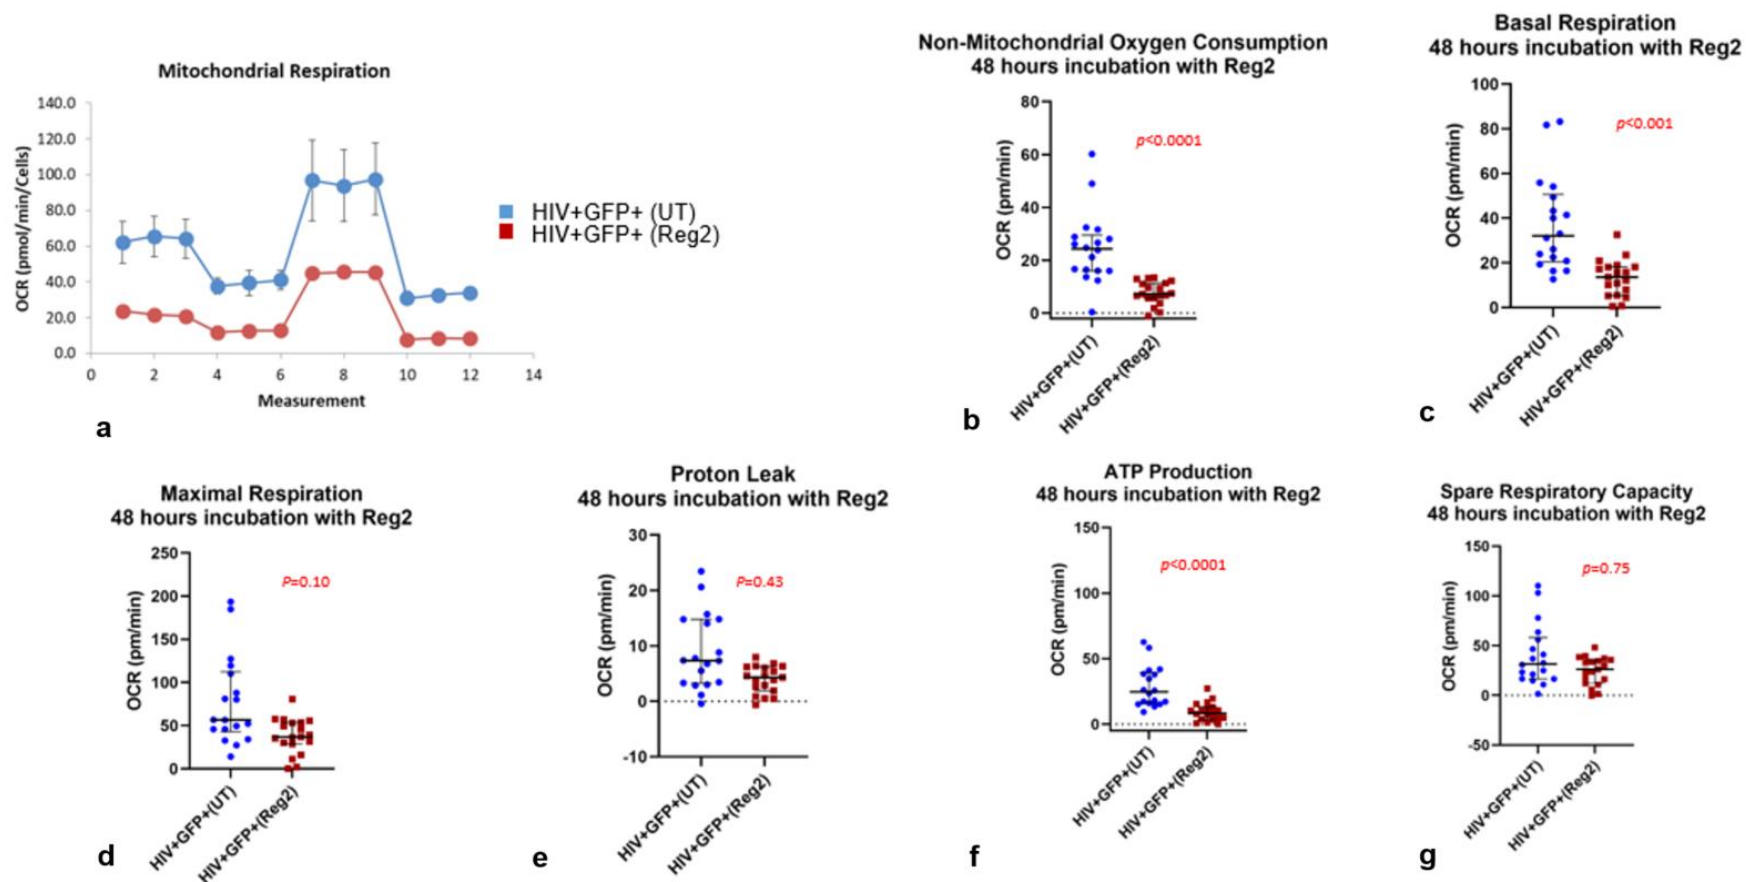

**Figure S6.** Antiretroviral Regimen2 (*Reg2*) reduces several components of mitochondrial respiratory function in activated HIV+ *huglia* at 48 hours. (a), MitoStress curve (blue=vehicle-treated controls (*UT*); red=drug-treated cells); (b), non-mitochondrial OCR; (c) basal respiration; (d), maximal respiration; (e) proton leak; (f) ATP production; (g) spare respiratory capacity. Median and interquartile ranges of OCR values are shown. ( $p$ -values obtained by Mann-Whitney U test)



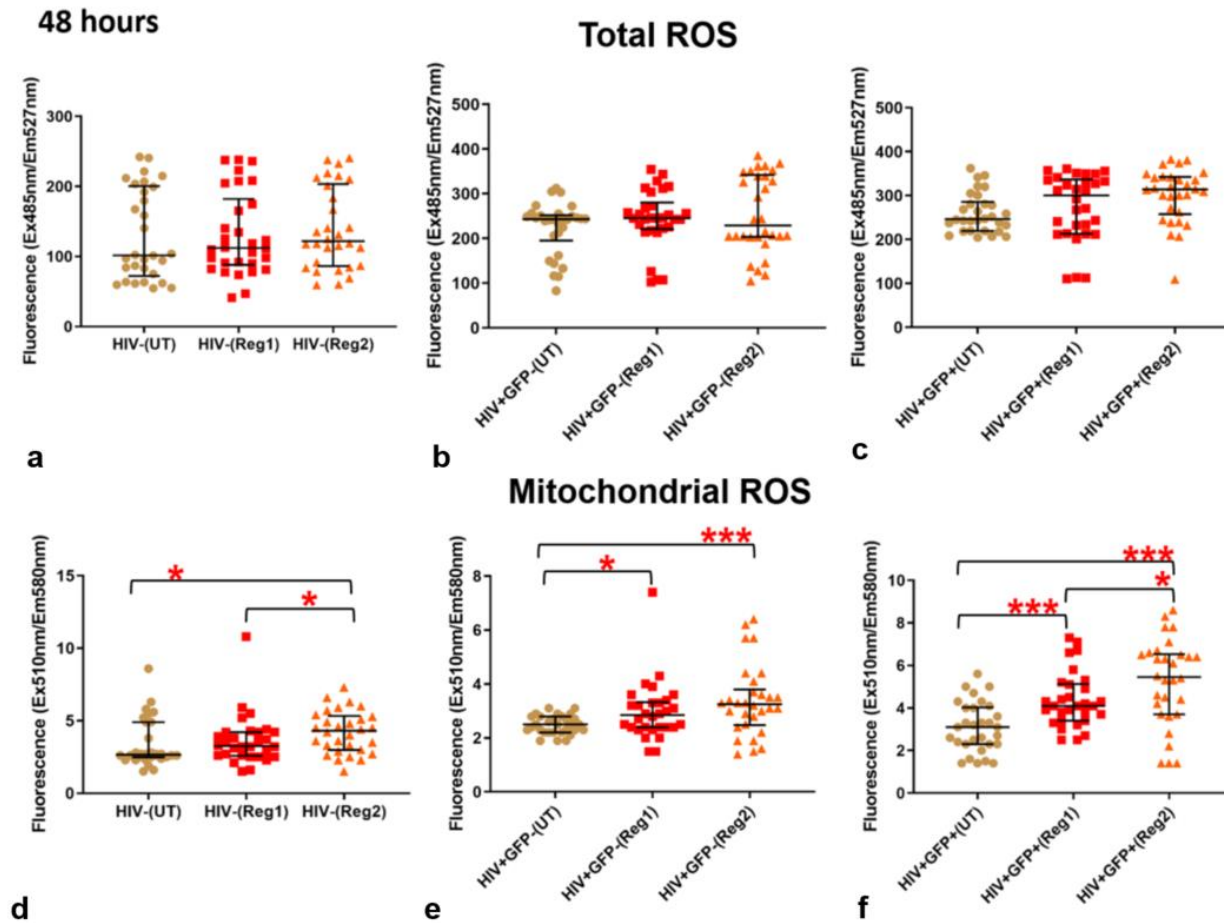

**Figure S7.** Effects of Regimen1 (*Reg1*) and Regimen2 (*Reg2*) after 48 hours on (a-c) total cellular reactive oxygen species (ROS) production and (d-f) mitochondrial ROS production in: (a, d) uninfected, (b, e) latently infected HIV+, and (c, f) activated HIV+ hpglia. \* $p < 0.05$ ; \*\* $p < 0.005$ ;



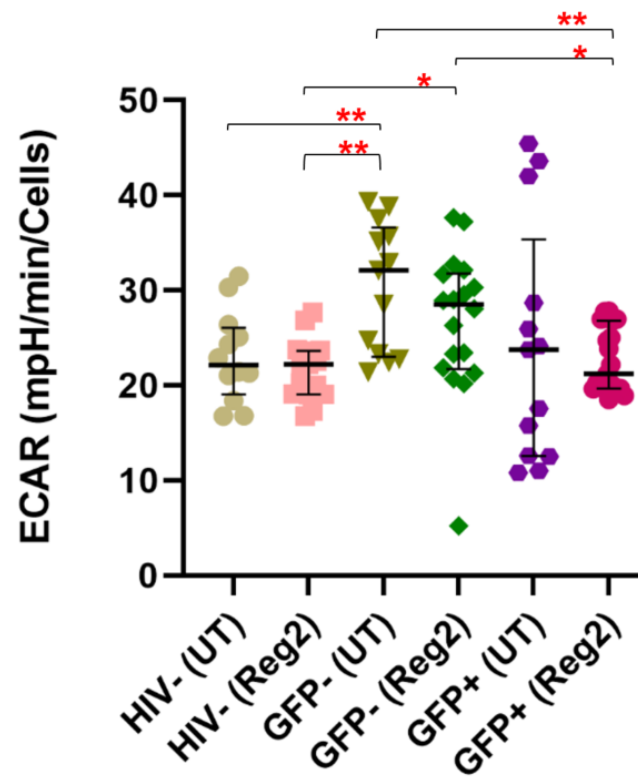

**Figure S8.** Extracellular acidification (glycolytic) rate (*ECAR*) measurements in uninfected, latently infected-HIV+(GFP-), and activated HIV+(GFP+) hpglia after a 24-hour incubation with Regimen2 (*Reg2*). Comparisons are made to untreated (vehicle) controls (*UT*), and only statistically significant differences are shown. \* $p<0.05$ ; \*\* $p<0.005$  (Mann-Whitney U test)

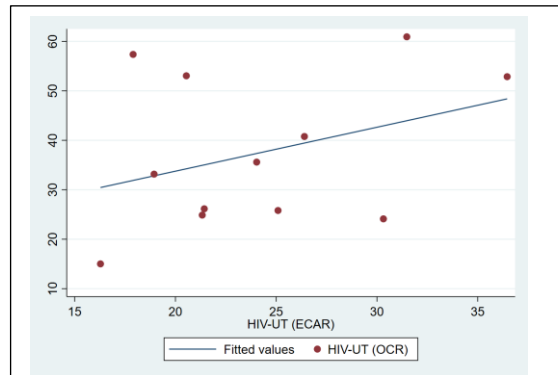

a. HIV-neg, UT:  $\rho=0.224$  ( $p=0.485$ )

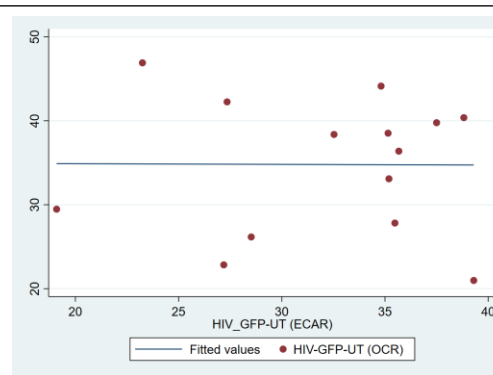

b. HIV+/GFP-, UT:  $\rho=-0.117$  ( $p=0.692$ )

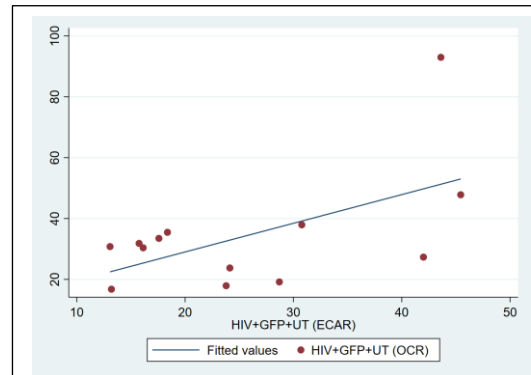

c. HIV+/GFP+, UT:  $\rho=0.412$  ( $p=0.162$ )

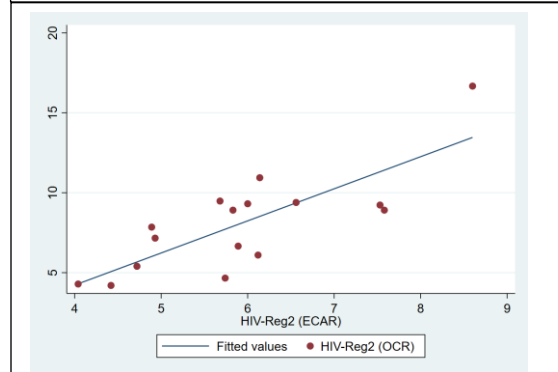

d. HIV-neg, Reg2:  $\rho=0.702$  ( **$p=0.002$** )

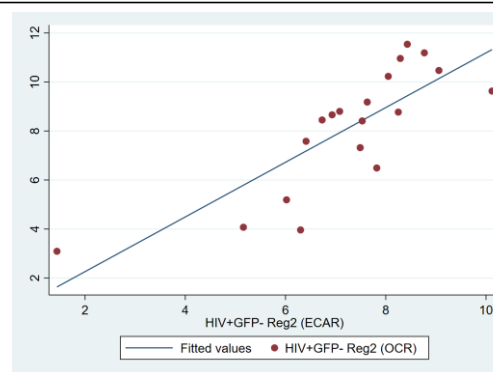

e. HIV+/GFP-, Reg2:  $\rho=0.854$  ( **$p<0.0001$** )

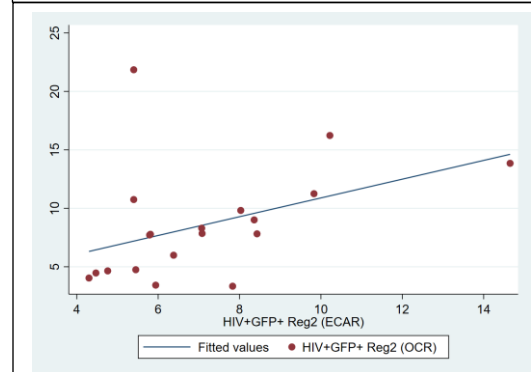

f. HIV+/GFP+, Reg2:  $\rho=0.488$  ( **$p=0.034$** )

**Figure S9.** Correlations between basal OCR (plotted on the Y-axis) and ECAR measurements in uninfected (*HIV-neg*), latently infected HIV+ (*HIV+/GFP-*), and activated HIV+ (*HIV+/GFP+*) hügla following Regimen2 exposure for 24 hours: (a-c) untreated cells; (d-f) Regimen2-treated cells after 24 hours. Spearman's  $\rho$  correlation  $p$ -values  $<0.05$  are statistically significant (**bolded**).

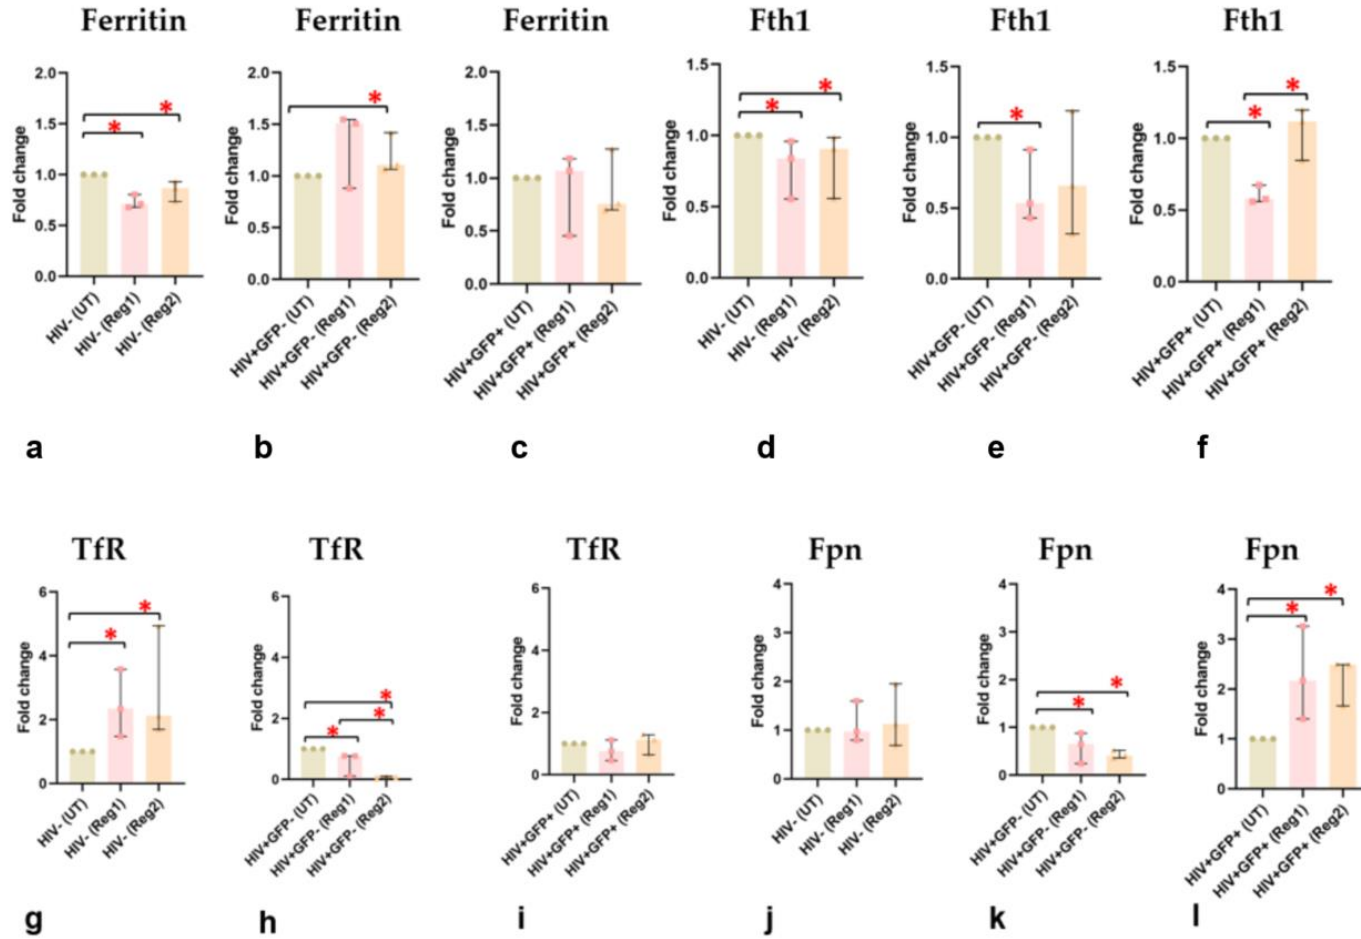

**Figure S10.** Quantification of (a-c) total ferritin, (d-f) Fth1, (g-i) TfR, and (j-l) Fpn in uninfected, latently infected HIV+ and activated HIV+ huglia at 48 hours after Regimen2 (Reg2) exposure. UT, untreated (vehicle-treated) controls; \* $p < 0.05$  (Mann-Whitney U test)

| Cell type             | Reg1          |               | Reg2                |        | Reg1 Iron phenotype | Reg2 Iron phenotype |
|-----------------------|---------------|---------------|---------------------|--------|---------------------|---------------------|
|                       | 24 hrs        | 48 hrs        | 24 hrs              | 48 hrs |                     |                     |
| <b>HIV-negative</b>   |               |               |                     |        |                     |                     |
| Ferritin              | NC            | DOWN*         | NC                  | DOWN*  | Iron import         | Iron import         |
| Fth1                  | NC            | DOWN*         | NC                  | DOWN*  | Iron import         | Iron import         |
| TfR                   | UP*           | UP*           | UP*                 | UP*    | Iron import         | Iron import         |
| Fpn                   | NC            | NC            | UP*                 | NC     | None                | Iron export         |
| Iron                  | UP*           | N/A           | UP*                 | N/A    | Iron replete/excess | Iron replete/excess |
| <b>Latent HIV+</b>    |               |               |                     |        |                     |                     |
| Ferritin              | UP*           | NC            | NC                  | DOWN*  | Iron export         | Iron import         |
| Fth1                  | NC            | DOWN*         | NC                  | NC     | Iron import         | None                |
| TfR                   | NC            | DOWN*         | NC                  | DOWN*  | Iron export         | Iron export         |
| Fpn                   | NC            | DOWN*         | NC                  | DOWN*  | Iron import         | Iron import         |
| Iron                  | UP*           | N/A           | UP*                 | N/A    | Iron replete/excess | Iron replete/excess |
| <b>Activated HIV+</b> |               |               |                     |        |                     |                     |
| Ferritin              | DOWN*         | NC            | DOWN*               | NC     | Iron import         | Iron import         |
| Fth1                  | NC            | DOWN*         | NC                  | UP*    | Iron import         | Iron export         |
| TfR                   | NC            | NC            | NC                  | NC     | None                | None                |
| Fpn                   | NC            | UP*           | NC                  | UP*    | Iron export         | Iron export         |
| Iron                  | UP*           | N/A           | DOWN*               | N/A    | Iron replete/excess | Reduced/Low iron    |
| <b>SH-SY5Y cells</b>  |               |               |                     |        |                     |                     |
|                       | <b>BIC</b>    | <b>Reg2</b>   | <b>Comments</b>     |        |                     |                     |
|                       | <b>24 hrs</b> | <b>24 hrs</b> |                     |        |                     |                     |
| Ferritin              | N/A           | N/A           | None                |        |                     |                     |
| Fth1                  | DOWN*         | DOWN*         | Iron import         |        |                     |                     |
| TfR                   | UP*           | N/A           | Iron import         |        |                     |                     |
| Iron                  | N/A           | UP*           | Iron replete/excess |        |                     |                     |

**Table S2.** Summary of changes in cellular iron phenotype of hµglia and SH-SY5Y cells after exposure to ARV Regimens 1 or 2, indicating altered iron homeostasis and dysregulated iron transport protein expression, due to both ARVs and HIV in hµglia, and ARVs in the neural cells. \*Statistically significant with  $p$ -value<0.05; Reg1/2, Regimen 1/2; NC, no change; N/A, not assessed. TfR changes were used to anchor assessment of iron import vs. export.

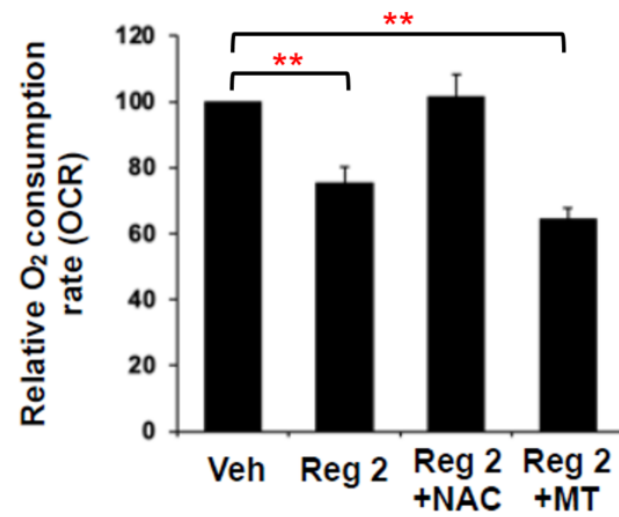

**Figure S11.** N-acetylcysteine (*NAC*), a cytosolic ROS scavenger, but not the mitochondrial ROS scavenger MitoTEMPO (*MT*) rescues the mitochondrial defect due to ARV Regimen2 (*Reg2*) in SH-SY5Y cells at 24 hours. \*\* $p=0.007$
